# Supplementary material for: Attrition in a 30-year follow-up of a perinatal birth risk cohort: factors change with age
Source: PeerJ journal article supplement (doi:10.7717/peerj.480), 2014-07-08
Supplement: S4_Questionnaire_to_parents_at_16_years.pdf [file S4_Questionnaire_to_parents_at_16_years.pdf]

## Questionnaire to parents at 16 years

Name, age etc.

Which one of the adjectives in the following list of adjective pairs describes the child better? Evaluation is given on a 5-category Likert-scale: Accurately / Fair / Neither / Fair / Accurately

|                         |                          |
|-------------------------|--------------------------|
| open                    | introverted              |
| Persevering, persistent | impatient                |
| Slow                    | Fast                     |
| Independent             | Dependent                |
| Irritable               | Cheerful                 |
| Clumsy                  | Nimble                   |
| At ease                 | Restless                 |
| Attentive               | Daydreaming              |
| Cheerful                | Sad                      |
| Insecure                | Determined               |
| Reliable                | Unreliable               |
| Sociable                | Unsociable               |
| Changeful               | Balanced                 |
| Enthusiastic            | Bored                    |
| Dexterous               | Inept                    |
| Confident               | Submissive               |
| Disturbing              | compliant                |
| Careful                 | Careless                 |
| Extroverted             | Timid                    |
| Compliant               | Bossy                    |
| Trustful                | Reserved                 |
| Mannerly                | Self-centered            |
| Bold                    | Polite                   |
| Subservient             | Attacking                |
| Independent             | Seeks attention          |
| Well-behaved            | Disobedient              |
| Self-controlled         | Confrontational          |
| Able to complete chores | Leaves chores unfinished |
| Well liked              | Bullied                  |
| Concentrates well       | Easily distracted        |

*The text above is a translation of the survey form. The original (copyright Katarina Michelsson) is in Finnish language and the translation was done by the first author of the manuscript. This is not an exact translation, it has not been validated, and it is not meant to be used as a survey form.*
