# Supplementary material for: Attrition in a 30-year follow-up of a perinatal birth risk cohort: factors change with age
Source: PeerJ journal article supplement (doi:10.7717/peerj.480), 2014-07-08
Supplement: S7_Supplement_table_variables_tested_response_vs_nonresponse.pdf [file S7_Supplement_table_variables_tested_response_vs_nonresponse.pdf]

Variables, which were tested for statistically significant group differences for response or nonresponse at birth (postnatal) and the ages of 5 years, 9 years, 16 years, and 30 years.

|         | Variable                                       | Type        | number of categories |
|---------|------------------------------------------------|-------------|----------------------|
| Birth   | Distance to hospital                           | ordinal     | 3                    |
|         | Father's social class                          | ordinal     | 5                    |
|         | Marital status                                 | ordinal     | 3                    |
|         | Mother's age                                   | continuous  |                      |
|         | Gender                                         | categorical | 2                    |
|         | Birth weight                                   | continuous  |                      |
|         | Weeks of gestation                             | continuous  |                      |
|         | Small for date                                 | categorical | 2                    |
|         | Large for date                                 | categorical | 2                    |
|         | Apgar score 1 min                              | continuous  |                      |
|         | Apgar score 5 min                              | continuous  |                      |
|         | Apgar score 15 min                             | continuous  |                      |
|         | Weight gain of mother                          | ordinal     | 2                    |
|         | X-ray investigation during pregnancy           | categorical | 2                    |
|         | Smoking during pregnancy                       | categorical | 2                    |
|         | Number of prior miscarriages                   | continuous  |                      |
|         | Pregnancy complications (composite score)      | continuous  |                      |
|         | Toxemia                                        | categorical | 2                    |
|         | Resuscitation postnatally                      | continuous  |                      |
|         | Hyperbilirubinemia                             | continuous  |                      |
|         | Respiratory difficulties                       | continuous  |                      |
|         | Neurological findings                          | continuous  |                      |
|         | Amniotic fluid (composite score)               | continuous  |                      |
|         | Placental abnormalities (composite score)      | continuous  |                      |
|         | Cord complications (composite score)           | continuous  |                      |
|         | Number of medical procedures (composite score) | continuous  |                      |
|         | Number of drugs given during labor             | continuous  |                      |
|         | Cesarean section                               | categorical | 2                    |
|         | Duration of first phase of delivery            | continuous  |                      |
|         | Duration of second phase of delivery           | continuous  |                      |
| 5 years | Housing conditions (Number occupants / room)   | continuous  |                      |
|         | Months mother working during pregnancy         | ordinal     | 3                    |
|         | Parity                                         | continuous  |                      |
|         | Social distress (composite score)              | continuous  |                      |
|         | Domestic disputes                              | categorical | 2                    |

|          |                                                      |             |   |
|----------|------------------------------------------------------|-------------|---|
|          | Goodenough Draw-a-person test (DAP)                  | continuous  |   |
|          | NDS coordination (composite score)                   | continuous  |   |
|          | NDS behavior (composite score)                       | continuous  |   |
|          | NDS total score                                      | continuous  |   |
|          | Dubowitz test total score                            | continuous  |   |
|          | ITPA average score                                   | continuous  |   |
| 9 years  | Social distress (composite score)                    | continuous  |   |
|          | Special class                                        | ordinal     | 4 |
|          | Teacher's assessment of school achievement           | ordinal     | 5 |
|          | Remedial tutoring                                    | categorical | 2 |
|          | Teacher's assessment of coordinative ability         | ordinal     | 5 |
|          | Teachers assessment of restlessness                  | ordinal     | 5 |
|          | Teachers assessment of adjustment                    | ordinal     | 5 |
|          | Parents' assessment of school achievement            | ordinal     | 5 |
|          | School grades                                        | continuous  |   |
|          | ITPA average score                                   | continuous  |   |
|          | WISC VIQ                                             | continuous  |   |
|          | WISC PIQ                                             | continuous  |   |
|          | WISC IQ                                              | continuous  |   |
|          | Parents' perceived benefit of participation in study | ordinal     | 3 |
|          | TOMI total score                                     | continuous  |   |
|          | Goodenough Draw-a-person test (DAP)                  | continuous  |   |
| 16 years | Current school / occupational status                 | ordinal     | 4 |
|          | Occupational plan                                    | ordinal     | 4 |
|          | Parents assessment                                   | ordinal     | 5 |
|          | YSR sum score                                        | continuous  |   |
|          | YSR internalizing                                    | continuous  |   |
|          | YSR externalizing                                    | continuous  |   |

ITPA = Illinois Test of Psycholinguistic Ability, NDS = Neurodevelopmental Screening test, WAIS = Wechsler Intelligence Scale for Children, IQ = intelligence quotient, VIQ = visual intelligence quotient, PIQ = performance intelligence quotient, TOMI = Test of Motor Impairment, YSR = Youth Self Rating (Achenbach)
